# Supplementary material
Source: ML conference proceedings conference paper supplement (https://openaccess.thecvf.com/content/WACV2023/html/Rahman_Medical_Image_Segmentation_WACV_2023_paper.html)
Supplement: Supplementary file 2 [file Rahman_Medical_Image_Segmentation_WACV_2023_supplemental.zip]

Archive with 2 entries (2 files):
- 2100-supp/2100-supp.pdf
- 2100-supp/code.zip
